# Supplementary material for: Assessing balance in people with bilateral vestibulopathy using the Mini-Balance Evaluation Systems Test (Mini-BESTest): feasibility and comparison with healthy control data
Source: Springer Nature journal article supplement (doi:10.1007/s00415-023-11795-y), 2023-06-03
Supplement: MOESM1 [file 25445370]

## **Supplementary Information for:**

# **Assessing Balance in People with Bilateral Vestibulopathy using the Mini-Balance Evaluation Systems Test (Mini-BESTest): Feasibility and Comparison with Healthy Control Data**

## ***Journal of Neurology***

Meichan Zhu<sup>1,2,3\*</sup>, Lisa van Stiphout<sup>1</sup>, Mustafa Karabulut<sup>1</sup>, Angélica Pérez Fornos<sup>4</sup>, Nils Guinand<sup>4</sup>, Kenneth Meijer<sup>2</sup>, Raymond van de Berg<sup>1</sup>, Christopher McCrum<sup>2\*</sup>

<sup>1</sup>Department of Otorhinolaryngology and Head and Neck Surgery, Division of Balance Disorders, Maastricht University Medical Center, School for Mental Health and Neuroscience, Maastricht, The Netherlands

<sup>2</sup>Department of Nutrition and Movement Sciences, NUTRIM School of Nutrition and Translational Research in Metabolism, Maastricht University, Maastricht, The Netherlands

<sup>3</sup>Department of Otorhinolaryngology, Guangzhou Twelfth People's Hospital (Guangzhou Otolaryngology- head and Neck Surgery hospital), No1.Tianqiang Road, Tianhe District, Guangzhou, Guangdong,510620, China

<sup>4</sup>Service of Otorhinolaryngology and Head and Neck Surgery, Department of Clinical Neurosciences, Geneva University Hospitals, Geneva, Switzerland

\*Correspondence:

Meichan Zhu: z.meichan@maastrichtuniversity.nl

Christopher McCrum: chris.mccrum@maastrichtuniversity.nl

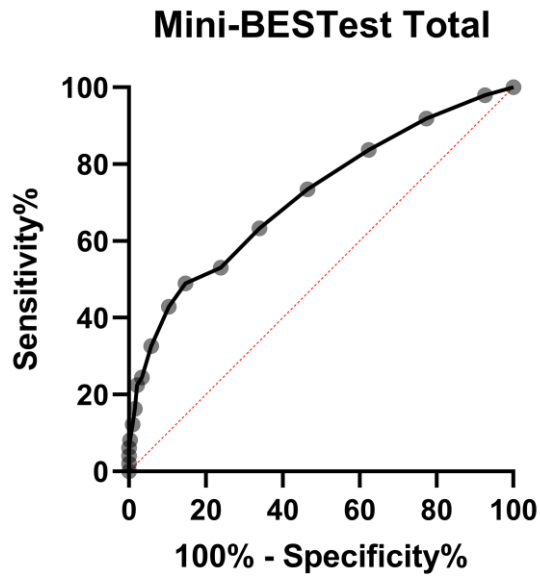

**Supplementary Figure 1:** Receiver operator characteristic (ROC) curve for prediction of BVP based on the Mini-BESTest total score.

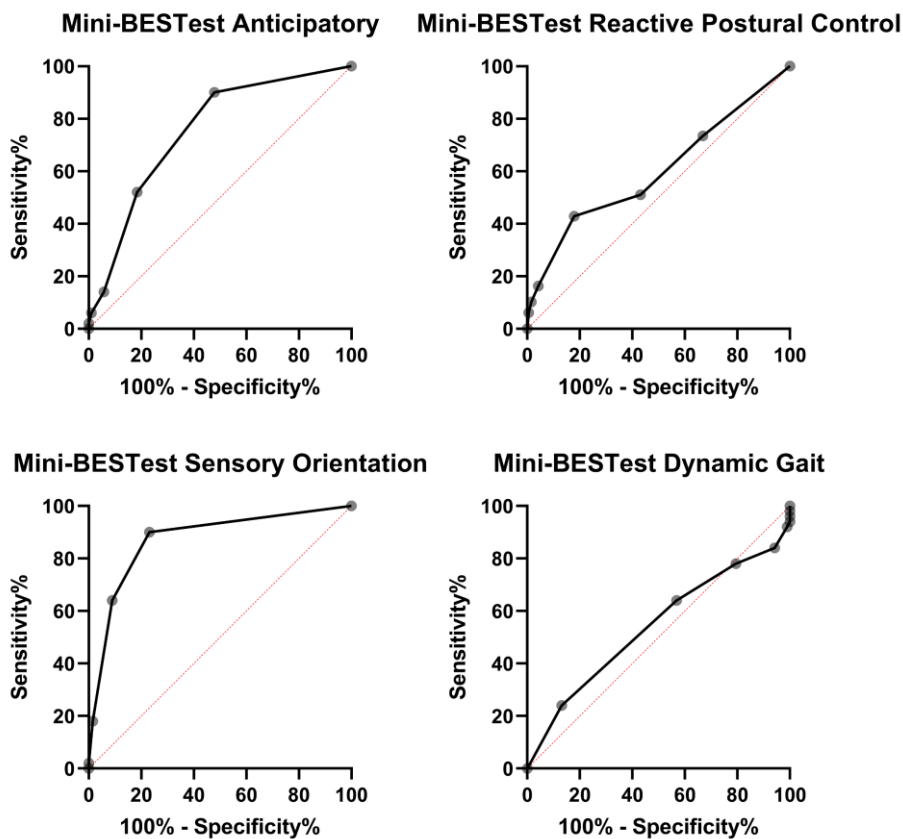

**Supplementary Figure 2:** Receiver operator characteristic (ROC) curves for prediction of BVP based on the Mini-BESTest sub scores.

**Supplementary Table 1:** Receiver Operator Characteristic Curve Outcomes for the Mini-BESTest Total and Sub Scores

| <b>Area under the ROC curve</b> | <b>Mini-BEST Total</b> | <b>Anticipatory</b> | <b>Reactive Postural Control</b> | <b>Sensory Orientation</b> | <b>Dynamic Gait</b> |
|---------------------------------|------------------------|---------------------|----------------------------------|----------------------------|---------------------|
| Area                            | 0.72                   | 0.75                | 0.60                             | 0.87                       | 0.54                |
| Std. Error                      | 0.043                  | 0.036               | 0.050                            | 0.030                      | 0.050               |
| 95% CI                          | 0.63 to 0.80           | 0.68 to 0.82        | 0.50 to 0.70                     | 0.81 to 0.93               | 0.44 to 0.64        |
| P value                         | <0.0001                | <0.0001             | 0.0334                           | <0.0001                    | 0.3900              |
| Controls                        | 327                    | 190                 | 190                              | 190                        | 190                 |
| Patients                        | 49                     | 50                  | 49                               | 50                         | 50                  |

**Supplementary Table 2:** Sensitivity and Specificity Outcomes for the Mini-BESTest Total Score

| <b>Cut-off</b> | <b>Sensitivity %</b> | <b>95% CI</b>     | <b>Specificity %</b> | <b>95% CI</b>    | <b>Likelihood ratio</b> |
|----------------|----------------------|-------------------|----------------------|------------------|-------------------------|
| < 4.000        | 2.041                | 0.1047% to 10.69% | 100.0                | 98.84% to 100.0% |                         |
| < 8.500        | 4.082                | 0.7252% to 13.71% | 100.0                | 98.84% to 100.0% |                         |
| < 11.50        | 6.122                | 2.104% to 16.52%  | 100.0                | 98.84% to 100.0% |                         |
| < 14.50        | 8.163                | 3.220% to 19.19%  | 99.69                | 98.29% to 99.98% | 26.69                   |
| < 15.50        | 12.24                | 5.735% to 24.24%  | 99.08                | 97.34% to 99.75% | 13.35                   |
| < 16.50        | 16.33                | 8.513% to 29.04%  | 98.47                | 96.47% to 99.35% | 10.68                   |
| < 17.50        | 22.45                | 13.02% to 35.88%  | 97.86                | 95.65% to 98.96% | 10.49                   |
| < 18.50        | 24.49                | 14.60% to 38.09%  | 96.64                | 94.08% to 98.11% | 7.280                   |
| < 19.50        | 32.65                | 21.21% to 46.62%  | 94.19                | 91.10% to 96.25% | 5.620                   |
| < 20.50        | 42.86                | 30.02% to 56.73%  | 89.60                | 85.82% to 92.46% | 4.122                   |
| < 21.50        | 48.98                | 35.58% to 62.53%  | 85.32                | 81.08% to 88.75% | 3.337                   |
| < 22.50        | 53.06                | 39.38% to 66.30%  | 76.15                | 71.24% to 80.45% | 2.224                   |
| < 23.50        | 63.27                | 49.27% to 75.33%  | 66.06                | 60.76% to 70.97% | 1.864                   |
| < 24.50        | 73.47                | 59.74% to 83.79%  | 53.52                | 48.10% to 58.85% | 1.581                   |
| < 25.50        | 83.67                | 70.96% to 91.49%  | 37.61                | 32.54% to 42.98% | 1.341                   |
| < 26.50        | 91.84                | 80.81% to 96.78%  | 22.63                | 18.43% to 27.47% | 1.187                   |
| < 27.50        | 97.96                | 89.31% to 99.90%  | 7.339                | 4.981% to 10.69% | 1.057                   |

**Supplementary Table 3: Sensitivity and Specificity Outcomes for the Mini-BESTest Sub Scores**

| Sub Score                        | Cut-off  | Sensitivity % | 95% CI            | Specificity % | 95% CI            | Likelihood ratio |
|----------------------------------|----------|---------------|-------------------|---------------|-------------------|------------------|
| <b>Anticipatory</b>              | < 1.000  | 2.000         | 0.1026% to 10.50% | 100.0         | 98.02% to 100.0%  |                  |
|                                  | < 2.500  | 6.000         | 1.635% to 16.22%  | 98.95         | 96.24% to 99.81%  | 5.700            |
|                                  | < 3.500  | 14.00         | 6.951% to 26.19%  | 94.21         | 89.93% to 96.74%  | 2.418            |
|                                  | < 4.500  | 52.00         | 38.51% to 65.20%  | 81.58         | 75.46% to 86.45%  | 2.823            |
|                                  | < 5.500  | 90.00         | 78.64% to 95.65%  | 52.11         | 45.03% to 59.10%  | 1.879            |
| <b>Reactive Postural Control</b> | < 0.5000 | 6.122         | 2.104% to 16.52%  | 99.47         | 97.08% to 99.97%  | 11.63            |
|                                  | < 1.500  | 10.20         | 4.438% to 21.76%  | 98.42         | 95.46% to 99.57%  | 6.463            |
|                                  | < 2.500  | 16.33         | 8.513% to 29.04%  | 95.79         | 91.91% to 97.85%  | 3.878            |
|                                  | < 3.500  | 42.86         | 30.02% to 56.73%  | 82.11         | 76.04% to 86.90%  | 2.395            |
|                                  | < 4.500  | 51.02         | 37.47% to 64.42%  | 56.84         | 49.73% to 63.68%  | 1.182            |
|                                  | < 5.500  | 73.47         | 59.74% to 83.79%  | 33.16         | 26.86% to 40.13%  | 1.099            |
| <b>Sensory Orientation</b>       | < 1.500  | 2.000         | 0.1026% to 10.50% | 100.0         | 98.02% to 100.0%  |                  |
|                                  | < 3.500  | 18.00         | 9.770% to 30.80%  | 98.42         | 95.46% to 99.57%  | 11.40            |
|                                  | < 4.500  | 64.00         | 50.14% to 75.86%  | 91.05         | 86.14% to 94.34%  | 7.153            |
|                                  | < 5.500  | 90.00         | 78.64% to 95.65%  | 76.84         | 70.35% to 82.27%  | 3.886            |
| <b>Dynamic Gait</b>              | > 1.000  | 98.00         | 89.50% to 99.90%  | 0.000         | 0.000% to 1.982%  | 0.9800           |
|                                  | > 2.500  | 96.00         | 86.54% to 99.29%  | 0.000         | 0.000% to 1.982%  | 0.9600           |
|                                  | > 4.000  | 94.00         | 83.78% to 98.36%  | 0.000         | 0.000% to 1.982%  | 0.9400           |
|                                  | > 5.500  | 92.00         | 81.16% to 96.85%  | 1.053         | 0.1870% to 3.756% | 0.9298           |
|                                  | > 6.500  | 84.00         | 71.49% to 91.66%  | 5.789         | 3.263% to 10.07%  | 0.8916           |
|                                  | > 7.500  | 78.00         | 64.76% to 87.25%  | 20.53         | 15.39% to 26.83%  | 0.9815           |
|                                  | > 8.500  | 64.00         | 50.14% to 75.86%  | 43.16         | 36.32% to 50.27%  | 1.126            |
|                                  | > 9.500  | 24.00         | 14.30% to 37.41%  | 86.84         | 81.30% to 90.93%  | 1.824            |
